# Supplementary material
Source: publisher figshare collection journal article supplement (https://aacr.figshare.com/articles/dataset/_/22430118)

Supplementary Figure S3.

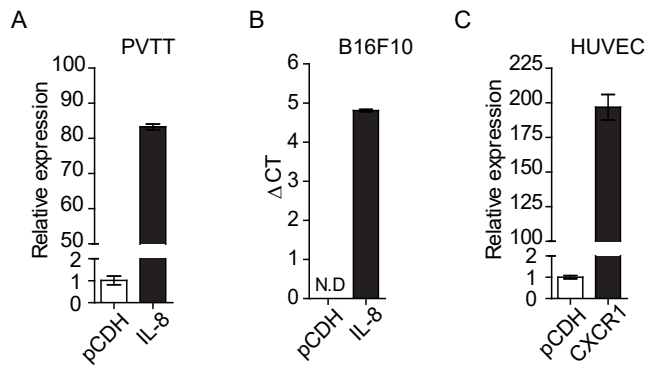

Supplement: Supplementary file 1 [file 39876450]
